# Supplementary material for: Joint experimental and theoretical studies of the surprising stability of the aryl pentazole upon noncovalent binding to β-cyclodextrin
Source: Royal Society of Chemistry journal article supplement (doi:10.1039/c7cp05783k), 2017-01-01
Supplement: c7cp05783k1.pdf [file c7cp05783k1.pdf]

## Supporting Information

### **Joint experimental and theoretical studies of surprising Stability of the Aryl Pentazole upon noncovalent binding to $\beta$ - cyclodextrin**

Yu-zhang Yang,<sup>a,b</sup> Xiao-feng Liu<sup>a</sup> Ru-bo Zhang<sup>a,\*</sup> and si-ping Pang<sup>b</sup>

<sup>a</sup>School of Chemistry and Chemical Engineering, Beijing Institute of Technology, South Street No. 5,  
Zhongguancun, Haidian District, 100081 Beijing, China

<sup>b</sup>School of Material Science & Engineering, Beijing Institute of Technology, South Street No. 5, Zhongguancun,  
Haidian District, 100081 Beijing, China

# Contents

## 1. Experiments

|                                                                   |   |
|-------------------------------------------------------------------|---|
| Synthesis of the host-guest of carbon nanotube and <b>1</b> ..... | 3 |
| Synthesis of the host-guest of cucurbituril[6] and <b>1</b> ..... | 3 |
| Synthesis of the host-guest of calixpyrrole[4] and <b>1</b> ..... | 3 |

## 2. Figures .....

4

|                                                                                                                                                          |    |
|----------------------------------------------------------------------------------------------------------------------------------------------------------|----|
| Figure S1 The DSC plot of the host-guest of carbon nanotube and <b>1</b> .....                                                                           | 4  |
| Figure S2 The DSC plot of the host-guest of cucurbituril[6] and <b>1</b> .....                                                                           | 4  |
| Figure S3 The DSC plot of the host-guest of calixpyrrole[4] and <b>1</b> .....                                                                           | 5  |
| Figure S4 The molecular electrostatic potentials for the isolated aryl pentazole, $\beta$ -CD and B1, B2, B3 B4 and B5 complexes .....                   | 5  |
| Figure S5 MC configurations based on CVFF field .....                                                                                                    | 7  |
| Figure S6 The bond lengths of the aryl pentazole in the isolated and host-guest complexes .....                                                          | 9  |
| Figure S7 Color-filled RDG isosurfaces depicting noncovalent interaction regions in the B1, B2, B4 and B5 complexes .....                                | 10 |
| Figure S8 NICS <sub>zz</sub> values plotted as a function of distance above and below the ring planes of the isolated, B1, B2, B4 and B5 complexes ..... | 12 |

## 3. Tables .....

13

|                                                                                                                                                         |    |
|---------------------------------------------------------------------------------------------------------------------------------------------------------|----|
| Table S1 Energy gaps, dipole moments and the first excited singlet energies for the isolated host, guest and their complexes .....                      | 13 |
| Table S2 QTAIM parameters corresponding to noncovalent interactions present in B1, B2, B4 and B5 inclusion complexes .....                              | 13 |
| Table S3 The selected charge transfer energies for the B3 complex from NBO calculations.....                                                            | 17 |
| Table S4 NMR chemical shifts of the isolated host, guest and the B3 complex calculated at the Wb97xd/ 6-31+G(d, p) and M06-2X/6-31+G(d, p) levels ..... | 17 |
| Table S5 NMR chemical shifts of the isolated host and the B1, B2, B4 and B5 complexes .....                                                             | 19 |
| Table S6 The relative energies along the decomposition paths of the aryl pentazole in the host-guest complexes .....                                    | 21 |

|                                                                                                                                |    |
|--------------------------------------------------------------------------------------------------------------------------------|----|
| Figure S7 Vibration frequencies for the pentazole ring of the isolated aryl pentazole and the host-guest complexes B1~B5 ..... | 22 |
|--------------------------------------------------------------------------------------------------------------------------------|----|

|                                                                                          |    |
|------------------------------------------------------------------------------------------|----|
| 4. Notes on the $O_{\text{aryl}}-H_{\text{acid}} \cdots H5-C5$ interaction details ..... | 23 |
|------------------------------------------------------------------------------------------|----|

## 1. Supporting Experiments

### Synthesis of the host-guest of carbon nanotube and **1**

$\beta$ -Cyclodextrin ( $\beta$ -CD) (10 mg) was set in suspension in 20 mL of MeOH and  $\text{CH}_2\text{Cl}_2$  at  $-35\text{ }^\circ\text{C}$ . After 30 min stirring, the 5 ml dichloromethane solution of **1** (5 mg) was added dropwise during 1 min. The solution was stirred for 36 h at  $-50\text{ }^\circ\text{C}$ . The green-grey product was obtained by filtering and vacuum drying. All glass (including filters) and solutions, used in the following work were cooled to between  $-60$  and  $-50\text{ }^\circ\text{C}$  by a cold bath of liquid  $\text{N}_2$ . A small amount of *p*-dimethylaminophenylazide (**2**) was produced by decomposition of **1** inevitably.

### Synthesis of the host-guest of cucurbituril[6] and **1**

Cucurbituril[6] (10 mg) was set in suspension in 20 mL of MeOH and  $\text{CH}_2\text{Cl}_2$  at  $-35\text{ }^\circ\text{C}$ . After 30 min stirring, the 5 ml dichloromethane solution of **1** (5 mg) was added dropwise during 1 min. The solution was stirred for 36 h at  $-50\text{ }^\circ\text{C}$ . The green-grey product was obtained by filtering and vacuum drying. All glass (including filters) and solutions, used in the following work were cooled to between  $-60$  and  $-50\text{ }^\circ\text{C}$  by a cold bath of liquid  $\text{N}_2$ . A small amount of *p*-dimethylaminophenylazide (**2**) was produced by decomposition of **1** inevitably. IR (KBr)  $\nu$ : 3446, 2997, 2932, 1757, 1731, 1474, 1417, 1377, 1328, 1298, 1283, 1240, 1191, 967, 801, 760, 673.

### Synthesis of the host-guest of calixpyrrole[4] and **1**

Calixpyrrole[4] (10 mg) was set in suspension in 20 mL of MeOH and  $\text{CH}_2\text{Cl}_2$  at  $-35\text{ }^\circ\text{C}$ . After 30 min stirring, the 5 ml dichloromethane solution of **1** (5 mg) was added dropwise during 1 min. The solution was stirred for 36 h at  $-50\text{ }^\circ\text{C}$ . The green-yellow product was obtained by evaporating and vacuum drying. All glass (including filters) and solutions, used in the following work were cooled to between  $-60$  and  $-50\text{ }^\circ\text{C}$  by a cold bath of liquid  $\text{N}_2$ . A small amount of *p*-dimethylaminophenylazide (**2**) was produced by decomposition of **1** inevitably. IR (KBr)  $\nu$ : 3443, 2971, 2928, 2870, 1662, 1519, 1385, 1348, 1230, 1041, 860, 771, 704, 565.

## 2. Supporting Figures

**Figure S1** The DSC plot of the host-guest of carbon nanotube and **1**

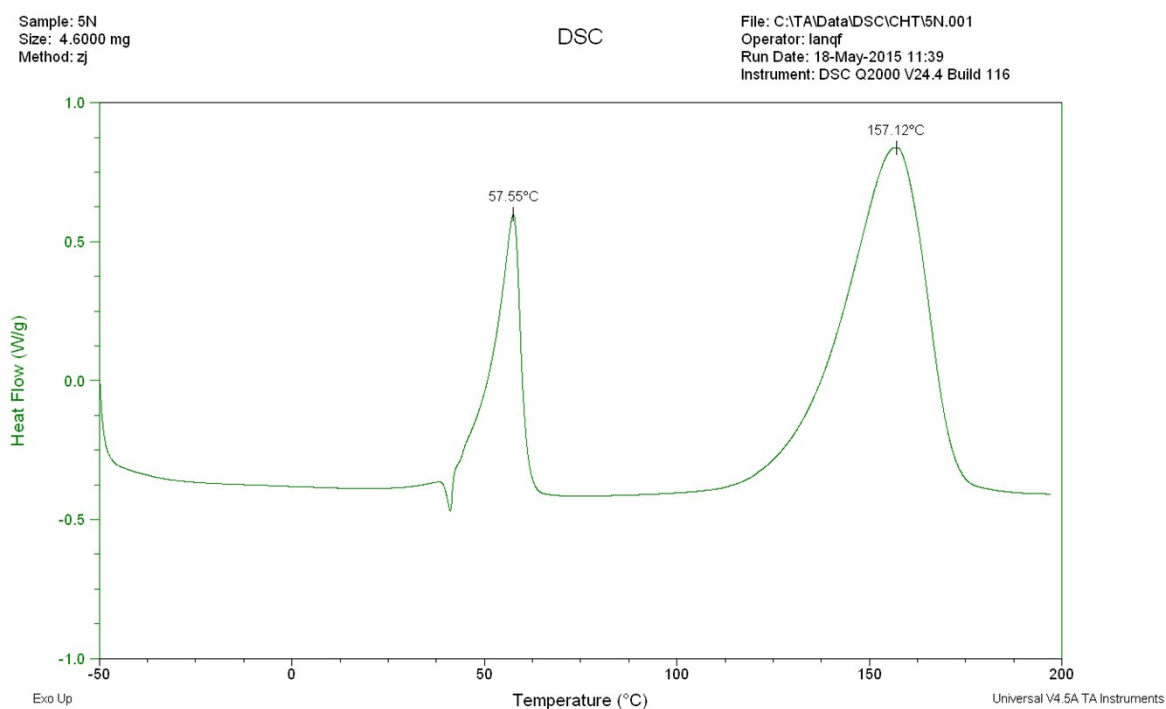

**Figure S2** The DSC plot of the host-guest of cucurbituril[6] and **1**

Sample: bit-B  
Size: 3.0000 mg  
Method: BIT-Egy  
Comment: bit-B

### DSC

File: F:\2013.11.8 北理合能\20131112\bit-B.001  
Operator: lanqf  
Run Date: 12-Nov-2013 10:53  
Instrument: DSC Q2000 V24.4 Build 116

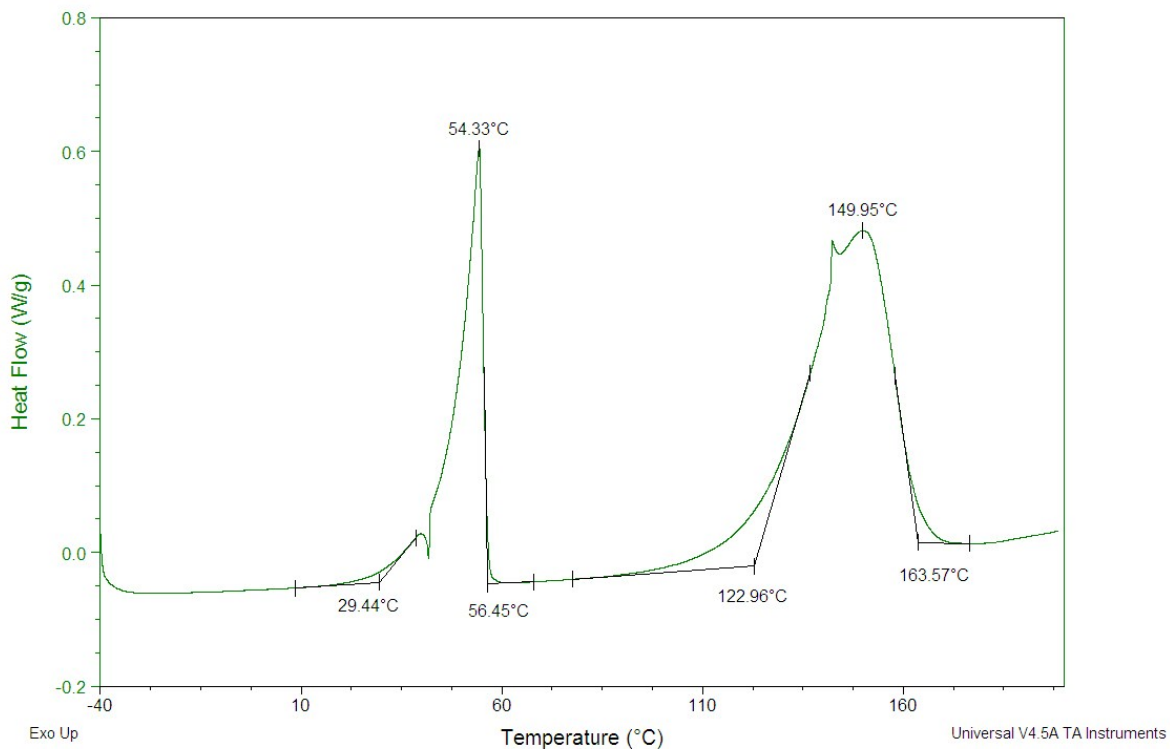

**Figure S3** The DSC plot of the host-guest of calixpyrrole[4] and **1**

Sample: bit-Chloride  
Size: 3.0000 mg  
Method: BIT-Egy  
Comment: bit-Chloride

DSC

File: F:\...2013.11.8 北理舍能\20131112\bit-A.001  
Operator: lanqf  
Run Date: 12-Nov-2013 09:53  
Instrument: DSC Q2000 V24.4 Build 116

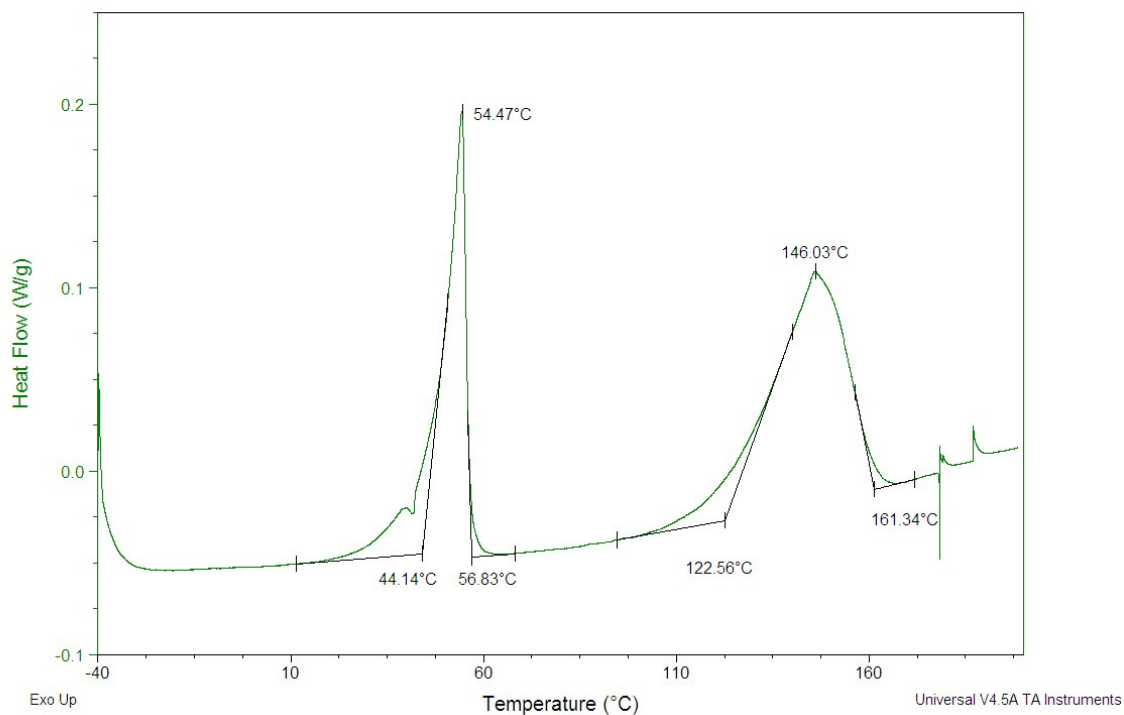

**Figure S4** The molecular electrostatic potentials for the isolated aryl pentazole,  $\beta$ -CD and **B1**, **B2**, **B3**, **B4** and **B5** complexes.

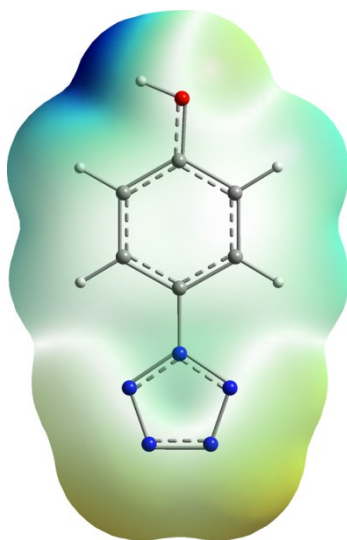

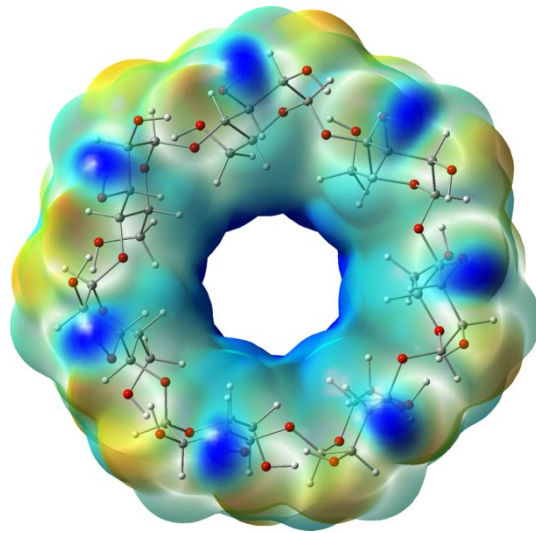

-0.101 0.101

**guest**

-0.070 0.070

**host**

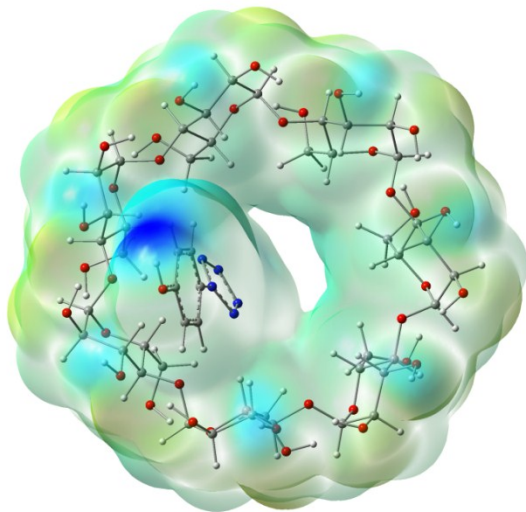

-0.116 0.116

**B1**

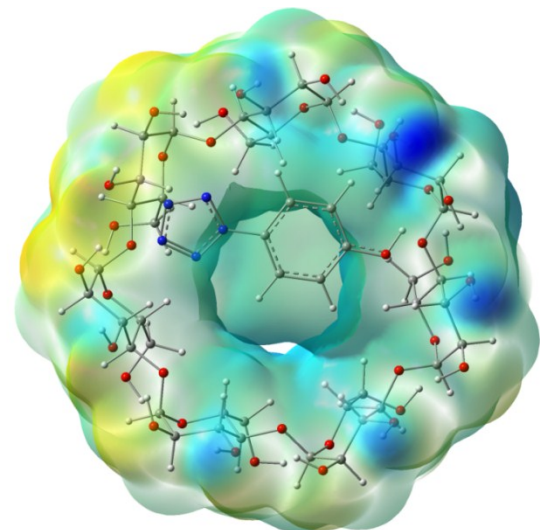

-0.091 0.091

**B2**

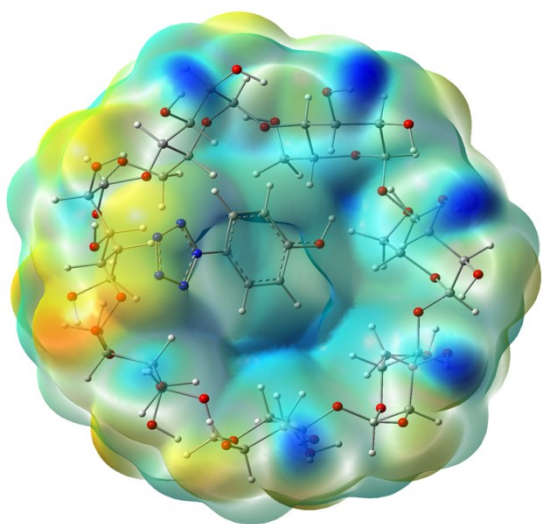

-0.078 0.078

**B3**

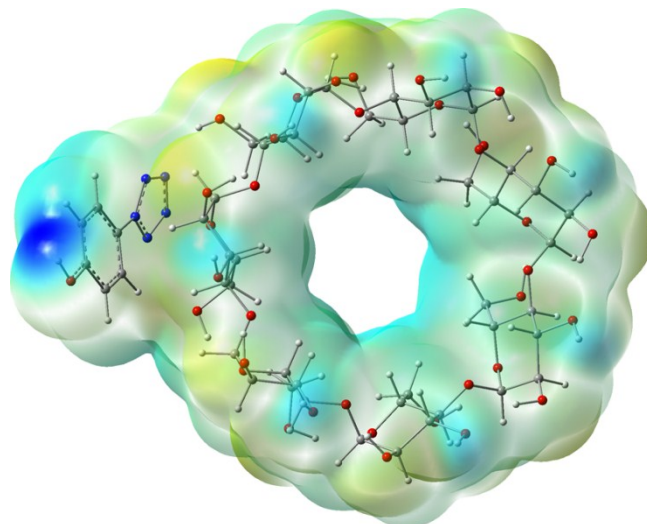

-0.107 0.107

**B4**

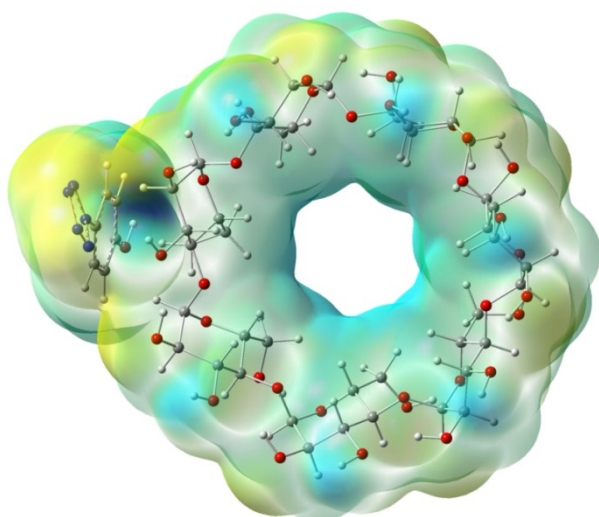

-0.105 0.105

**B5**

**Figure S5** Monte Carlo configurations based on CVFF field. Absorption energy (in kcal mol<sup>-1</sup>) in parentheses.



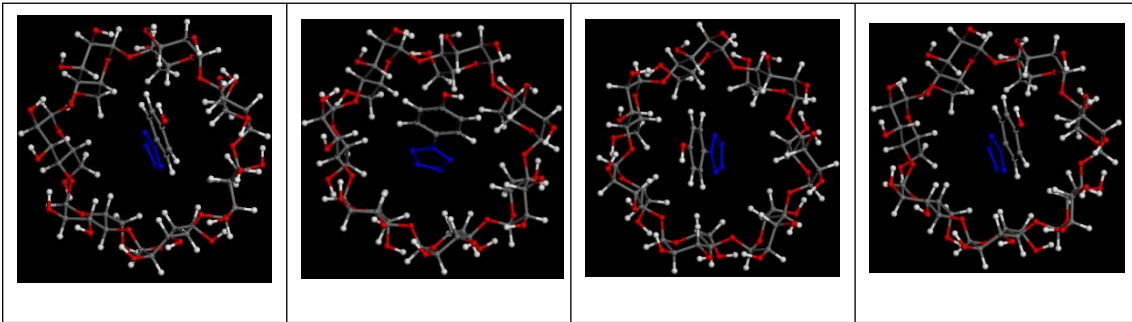

**1** (-38.9)

**2** (-38.7)

**3** (-38.4)

**4** (-38.2)

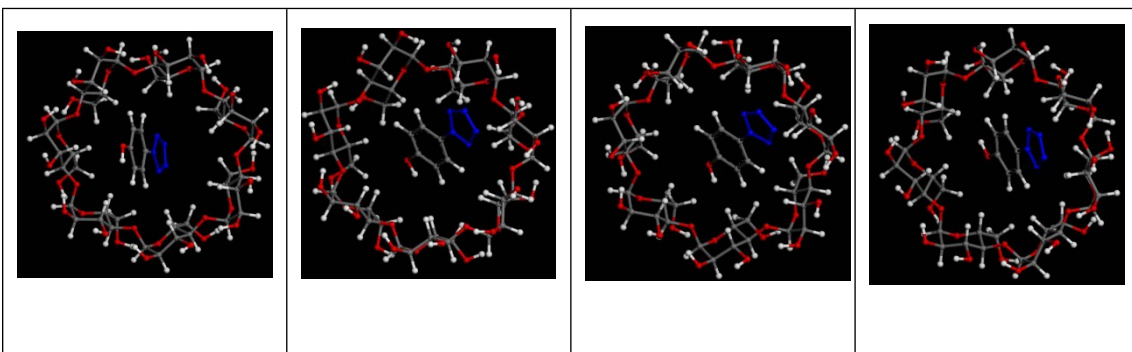

**5** (-37.8)

**6** (-36.7)

**7** (-36.3)

**8** (-36.1)

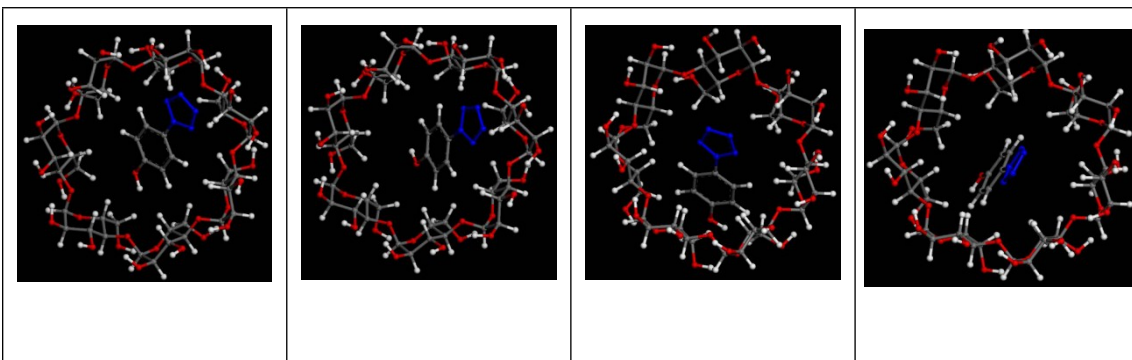

**9** (-35.7)

**10** (-35.3)

**11** (-33.1)

**12** (-32.1)

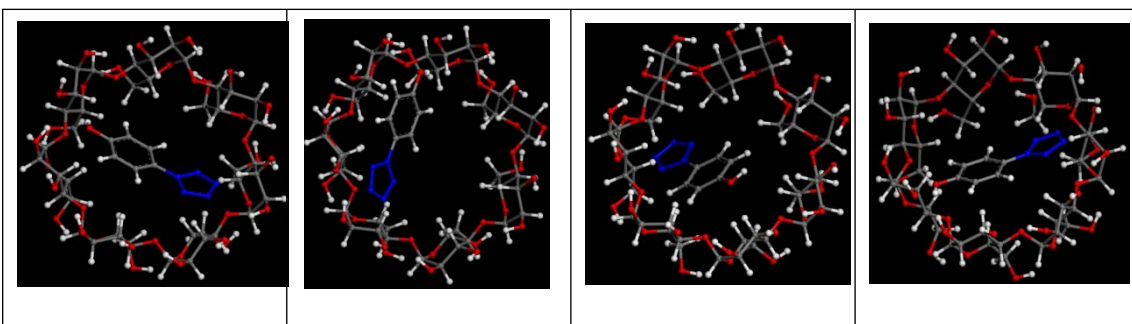

**13** (-29.6)

**14** (-28.3)

**15** (-27.7)

**16** (-27.6)

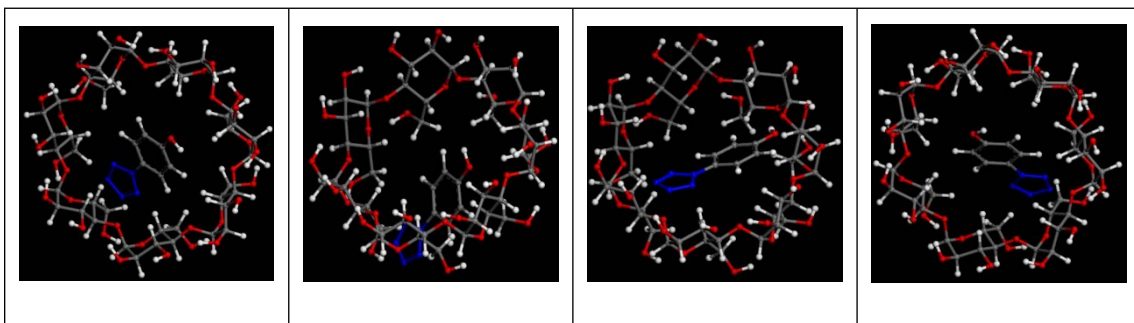

**17** (-27.5)

**18** (-27.2)

**19** (-26.6)

**20** (-26.6)

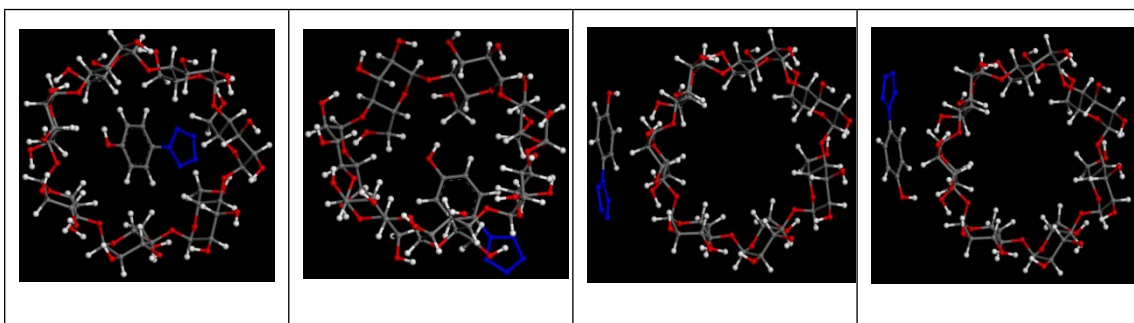

**21** (-26.1)

**22** (-25.7)

**23** (-25.4)

**24** (-25.2)

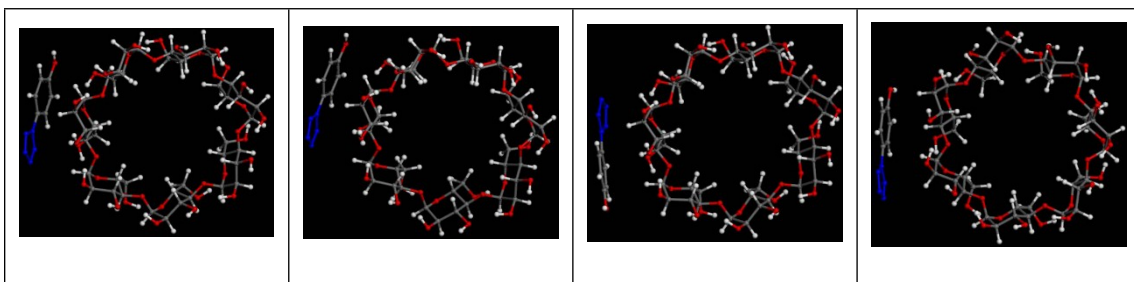

**25** (-25.0)

**26** (-24.7)

**27** (-24.5)

**28** (-24.2)

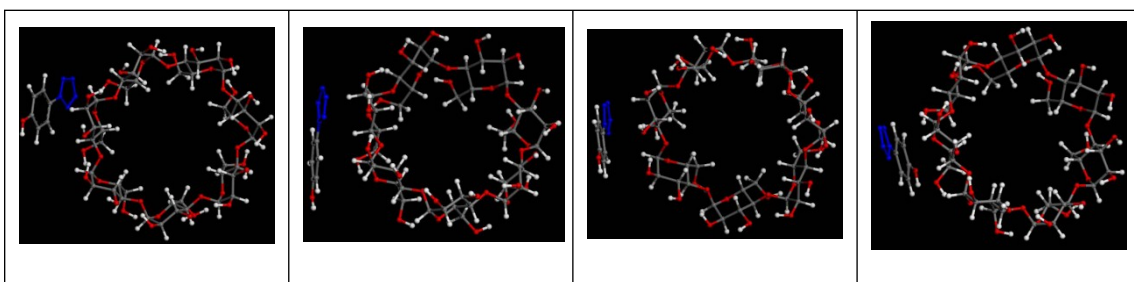

**29** (-23.8)

**30** (-23.6)

**31** (-23.3)

**32** (-22.5)

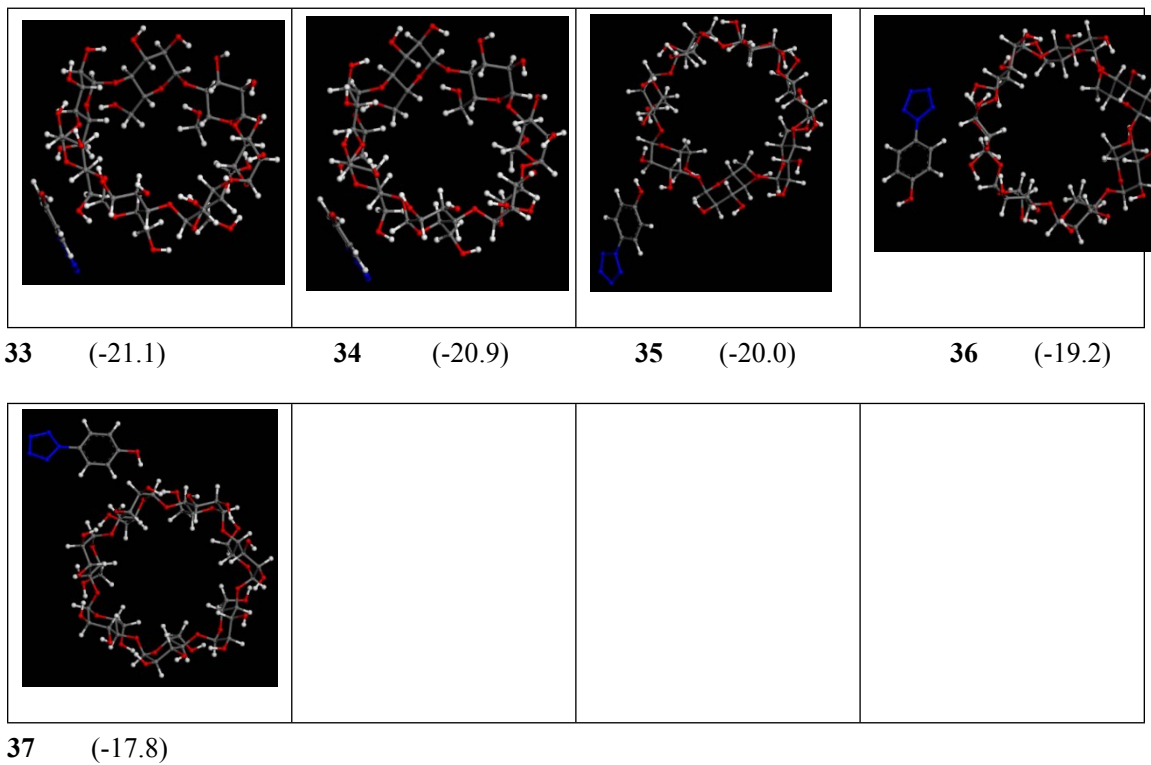

**Figure S6** The (a)N-N, (b) C-C and (c) C-H bond lengths of the aryl pentazole in the isolated and the **B1-B5** host-guest complexes from top to down, respectively..

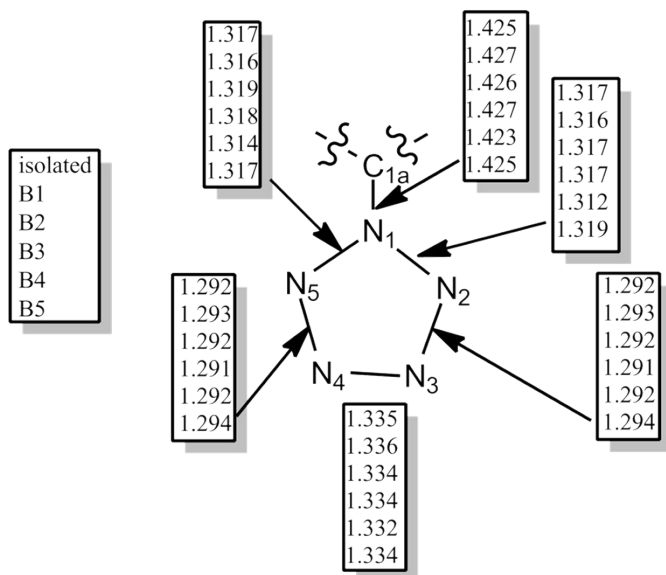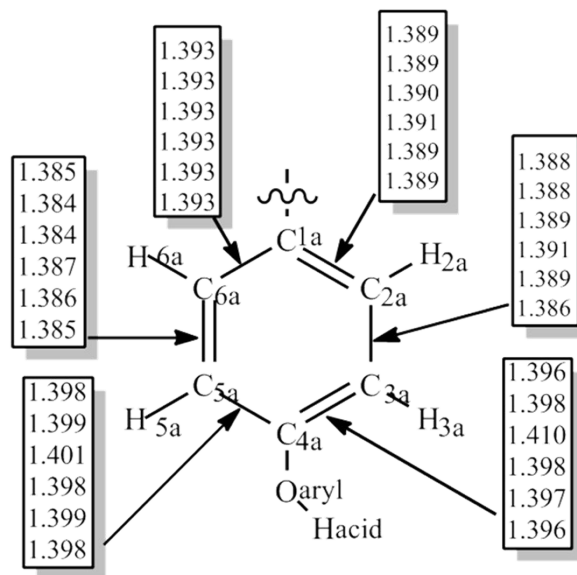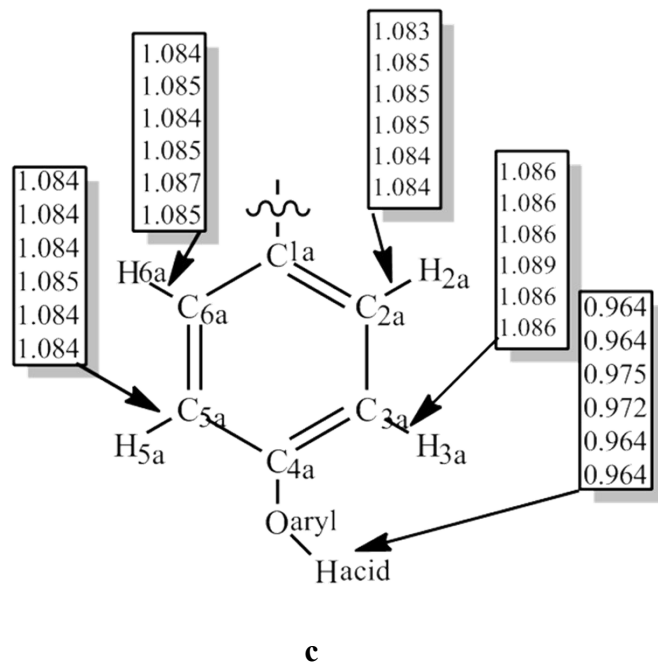

**Figure S7** Color-filled RDG isosurfaces (b) depicting noncovalent interaction regions (a) in the **B1**, **B2**, **B4** and **B5** complexes. Functions 1, 2 stands for  $\text{sign}(\lambda_2)\rho$  and RDG/s (in au.), respectively.

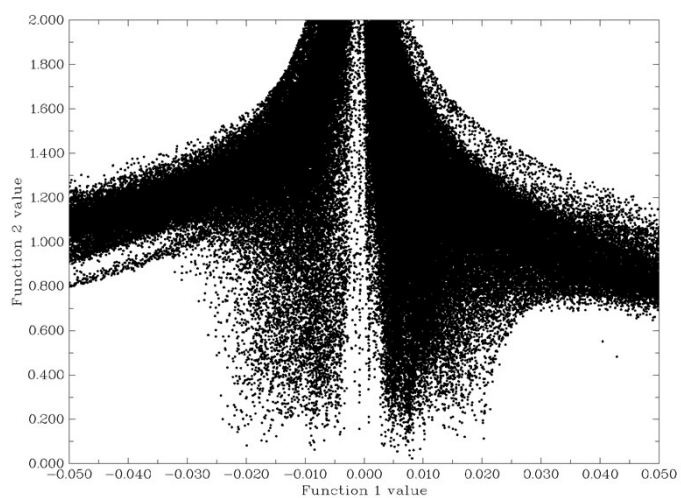

**B1a**

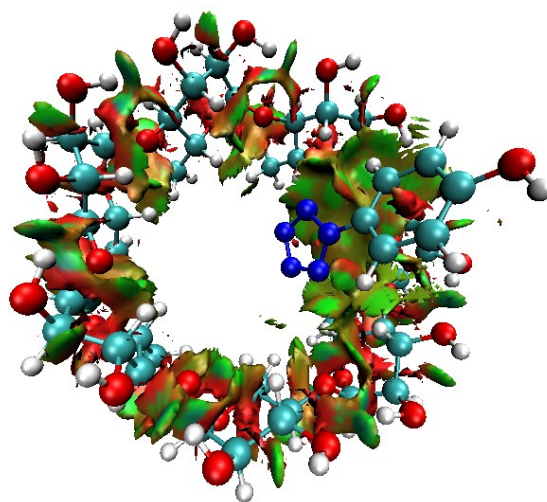

**B1b**

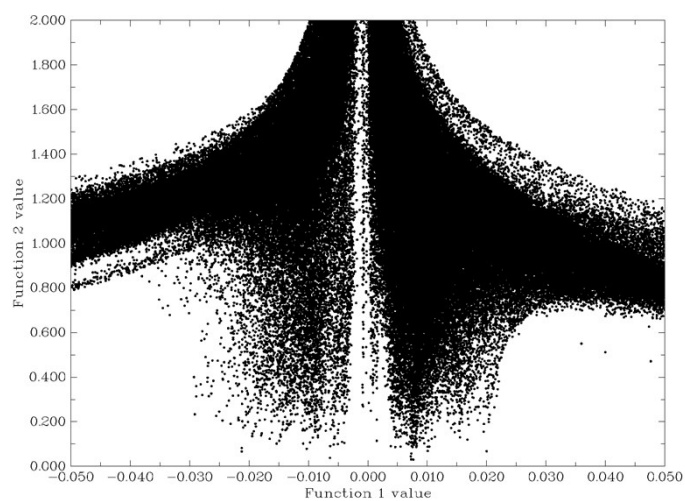

**B2a**

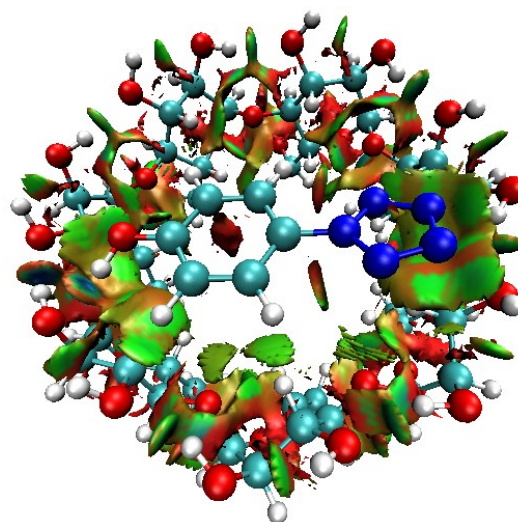

**B2b**

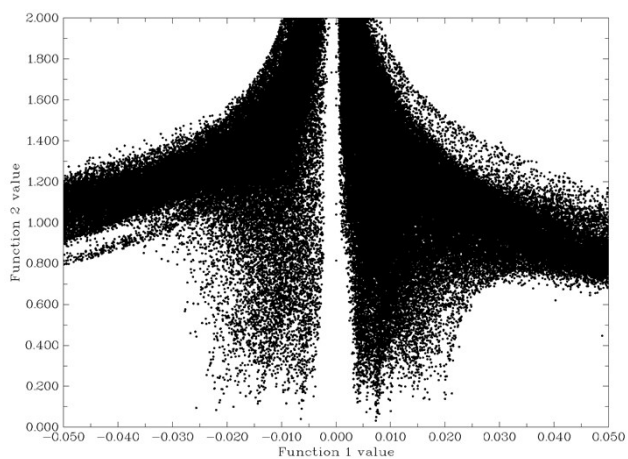

**B4a**

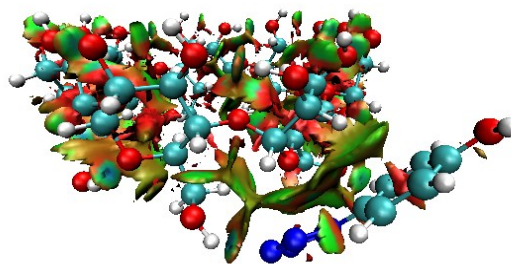

**B4b**

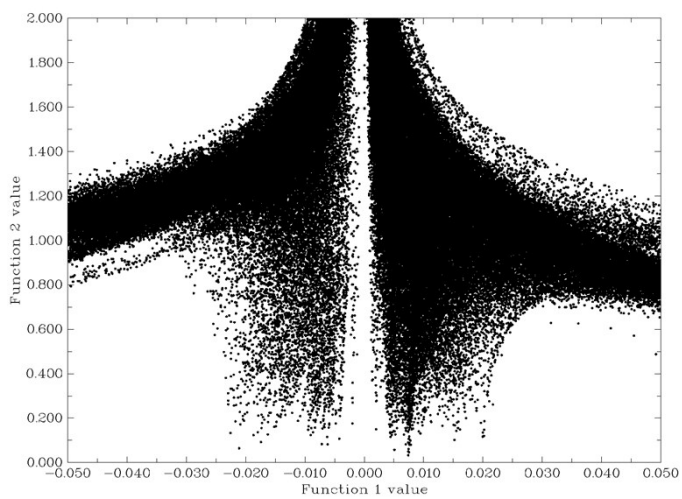

**B5a**

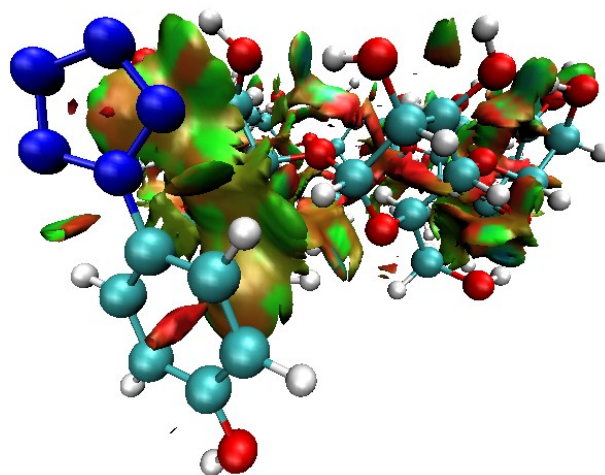

**B5b**

**Figure S8** NICS<sub>zz</sub> values plotted as a function of distance (in Å) above and below the ring planes of the **isolated**, **B1**, **B2**, **B4** and **B5** complexes. Red is referred to the phenyl ring and black to the pentazole ring.

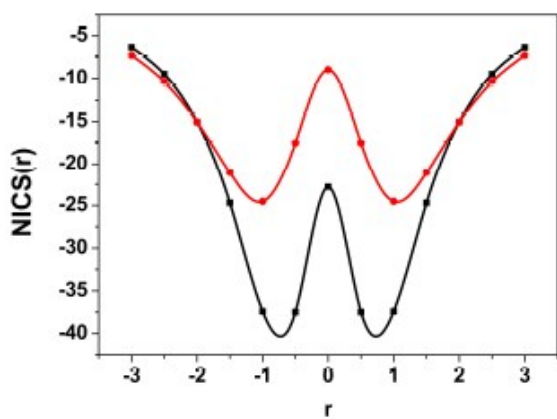

**Isolated**

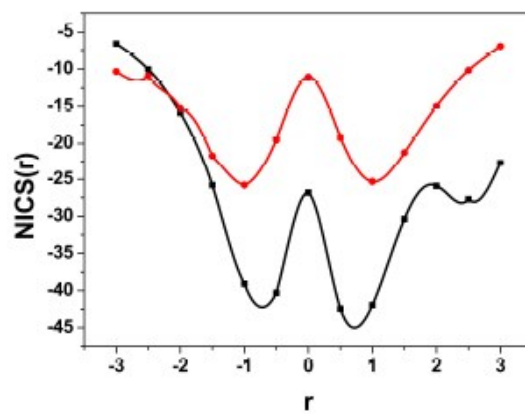

**B1**

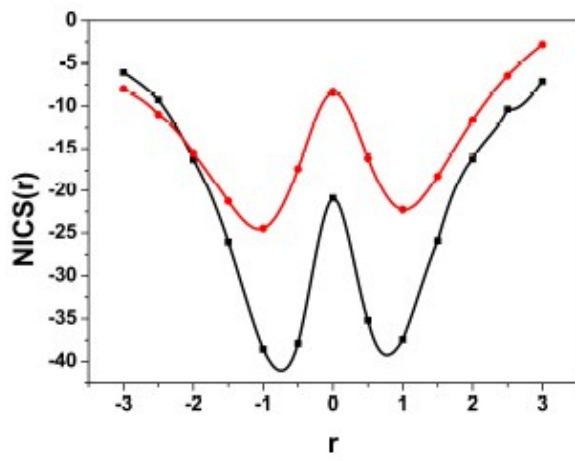

**B2**

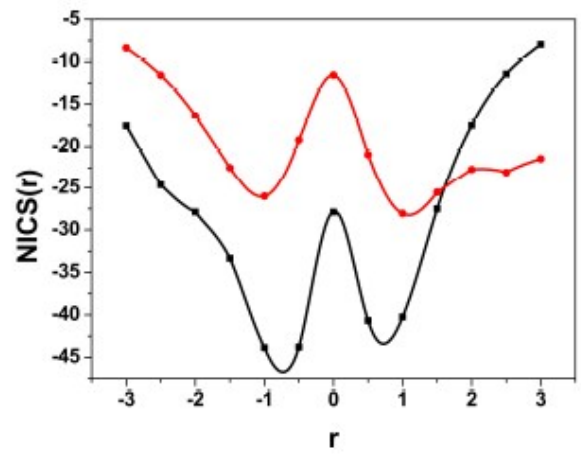

**B4**

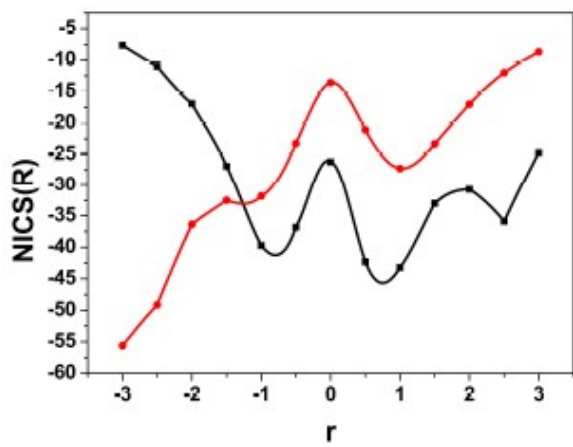

**B5**



## 2. Supporting Tables

**Table S1** Energy gaps, dipole moments and the first excited singlet energies for the isolated host, guest and their complexes.

|                                 | Guest | Host  | B1    | B2    | B3    | B4    | B5    |
|---------------------------------|-------|-------|-------|-------|-------|-------|-------|
| $E_{\text{HOMO}}/\text{eV}$     | -8.29 | -9.43 | -8.75 | -8.51 | -8.79 | -8.41 | -8.28 |
| $E_{\text{LUMO}}/\text{eV}$     | -1.06 | -0.99 | -1.58 | -1.45 | -1.54 | -1.14 | -1.06 |
| $E_g/\text{eV}$                 | 7.23  | 8.44  | 7.17  | 7.06  | 7.25  | 7.27  | 7.22  |
| dipole/D                        | 6.0   | 2.1   | 7.8   | 7.6   | 4.9   | 6.2   | 3.3   |
| $\lambda_{\text{SI}}/\text{nm}$ | 257   | /     | 256   | 262   | 256   | 253   | 257   |

**Table S2** QTAIM parameters corresponding to noncovalent interactions present in **B1**, **B2**, **B4** and **B5** inclusion complex.

For **B1**

| BCP                 | $\rho_b$<br>( $\times 10^3$ ) | $\nabla^2\rho_b$<br>( $\times 10^2$ ) | $\lambda_2$<br>( $\times 10^3$ ) | $G_b$<br>( $\times 10^3$ ) | $V_b$<br>( $\times 10^3$ ) | $H_b$<br>( $\times 10^3$ ) | $-G_b/V_b$<br>( $\times 10^3$ ) |
|---------------------|-------------------------------|---------------------------------------|----------------------------------|----------------------------|----------------------------|----------------------------|---------------------------------|
| N5 $\cdots$ H5(C5)  | 8.5                           | 3.1                                   | -4.2                             | 6.6                        | -5.5                       | 1.1                        | 1.20                            |
| N5 $\cdots$ Obridge | 8.5                           | 2.8                                   | -5.8                             | 6.5                        | -6                         | 0.5                        | 1.08                            |
| N5 $\cdots$ H3(C3)  | 6.8                           | 2.2                                   | -5.1                             | 4.6                        | -3.8                       | 0.8                        | 1.21                            |
| N4 $\cdots$ H5(C5)  | 0.79                          | 0.3                                   | -2.4                             | 5.3                        | -3                         | 2.3                        | 1.77                            |
| N2 $\cdots$ H3(C3)  | 6.7                           | 2.1                                   | -4.6                             | 4.5                        | -3.7                       | 0.8                        | 1.22                            |
| N2 $\cdots$ H5(C5)  | 9.8                           | 3.5                                   | -6.9                             | 7.5                        | -6.3                       | 1.2                        | 1.19                            |
| N3 $\cdots$ H5(C5)  | 8.7                           | 3                                     | -2.7                             | 6.6                        | -5.7                       | 0.9                        | 1.16                            |

|              |      |     |      |     |      |     |      |
|--------------|------|-----|------|-----|------|-----|------|
| H6a···H3(C3) | 8    | 2.8 | -6.8 | 5.8 | -4.4 | 1.4 | 1.32 |
| N4···H6(C6)  | 4.6  | 1.5 | -1.8 | 3.1 | -2.4 | 0.7 | 1.29 |
| N2···Obridge | 6.6  | 2.3 | -4.1 | 5.2 | -4.7 | 0.5 | 1.11 |
| H2a···H3(C3) | 5    | 1.8 | -3   | 3.3 | -2.2 | 1.1 | 1.50 |
| C6a···H3(C3) | 11.8 | 3.9 | -4.8 | 8.2 | -6.6 | 1.6 | 1.24 |
| H6a···O2(H2) | 9    | 3.1 | -6.4 | 6.9 | -6.1 | 0.8 | 1.13 |

---

For **B2**

| BCP                     | $\rho_b$<br>( $\times 10^3$ ) | $\nabla^2 \rho_b$<br>( $\times 10^2$ ) | $\lambda_2$<br>( $\times 10^3$ ) | $G_b$<br>( $\times 10^3$ ) | $V_b$<br>( $\times 10^3$ ) | $H_b$<br>( $\times 10^3$ ) | $-G_b/V_b$<br>( $\times 10^3$ ) |
|-------------------------|-------------------------------|----------------------------------------|----------------------------------|----------------------------|----------------------------|----------------------------|---------------------------------|
| N4 $\cdots$ Obridge     | 5.1                           | 1.8                                    | -1.9                             | 3.9                        | -3.4                       | 0.5                        | 1.15                            |
| N4 $\cdots$ H2(O2)      | 10.8                          | 3.8                                    | -8.9                             | 8.5                        | -7.4                       | 1.1                        | 1.15                            |
| N3 $\cdots$ H3(C3)      | 10                            | 3.7                                    | -4.8                             | 8                          | -6.6                       | 1.4                        | 1.21                            |
| N3 $\cdots$ O3(H3)      | 12.8                          | 5.1                                    | -6.1                             | 11                         | -9.4                       | 1.6                        | 1.17                            |
| N2 $\cdots$ O3(H3)      | 0.9                           | 0.4                                    | -0.2                             | 0.7                        | -0.4                       | 0.3                        | 1.75                            |
| N5 $\cdots$ H3(C3)      | 6.4                           | 2.3                                    | -3.7                             | 4.9                        | -3.8                       | 1.1                        | 1.29                            |
| C3a $\cdots$ H3(C3)     | 10.4                          | 3.8                                    | -4.2                             | 7.5                        | -5.8                       | 1.7                        | 1.29                            |
| H2a $\cdots$ H3(C3)     | 4.4                           | 1.5                                    | -2.2                             | 2.8                        | -1.8                       | 1                          | 1.56                            |
| H3a $\cdots$ O3(H3)     | 11                            | 3.6                                    | -9.6                             | 8.5                        | -8                         | 0.5                        | 1.06                            |
| H5a $\cdots$ H3(C3)     | 0.8                           | 0.3                                    | -5.1                             | 0.5                        | -0.3                       | 0.2                        | 1.67                            |
| H6a $\cdots$ H3(C3)     | 0.3                           | 0.1                                    | -0.2                             | 0.2                        | -0.1                       | 0.1                        | 2.00                            |
| Hacid $\cdots$ O2(2)    | 25.9                          | 7.6                                    | -32                              | 19.8                       | -20.6                      | -0.8                       | 0.96                            |
| Oaryl $\cdots$ Obridge  | 7.3                           | 2.6                                    | -4.1                             | 6                          | -5.7                       | 0.3                        | 1.05                            |
| Oaryl $\cdots$ H3(C3)   | 11                            | 3.9                                    | -10.2                            | 8.8                        | -8                         | 0.8                        | 1.10                            |
| Oaryl $\cdots$ H3'(C3') | 8.6                           | 3.6                                    | -2.8                             | 7.4                        | -5.7                       | 1.7                        | 1.30                            |

For **B3**

| BCP                                                           | $\rho_b$<br>( $\times 10^3$ ) | $\nabla^2\rho_b$<br>( $\times 10^2$ ) | $\lambda_2$<br>( $\times 10^3$ ) | $G_b$<br>( $\times 10^3$ ) | $V_b$<br>( $\times 10^3$ ) | $H_b$<br>( $\times 10^3$ ) | $-G_b/V_b$<br>( $\times 10^3$ ) |
|---------------------------------------------------------------|-------------------------------|---------------------------------------|----------------------------------|----------------------------|----------------------------|----------------------------|---------------------------------|
| N1 $\cdots$ H3 <sub>a</sub> (C3 <sub>a</sub> )                | 9.7                           | 3.4                                   | -1.6                             | 7.6                        | -6.5                       | 1.1                        | 1.17                            |
| N4 $\cdots$ O3(H3)                                            | 7.4                           | 3.0                                   | -3.5                             | 6.2                        | -5.0                       | 1.2                        | 1.24                            |
| N3 $\cdots$ O2(H2)                                            | 12.1                          | 4.5                                   | -4.7                             | 10.0                       | -8.7                       | 1.3                        | 1.15                            |
| N5 $\cdots$ H3 <sub>b</sub> (C3 <sub>b</sub> )                | 11.3                          | 3.6                                   | -10.3                            | 8.0                        | -6.9                       | 1.1                        | 1.16                            |
| H <sub>2a</sub> $\cdots$ O <sub>bridge</sub>                  | 4.0                           | 1.5                                   | -1.4                             | 2.9                        | -2.2                       | 0.7                        | 1.32                            |
| H <sub>2a</sub> $\cdots$ H3 <sub>a</sub> (C3 <sub>a</sub> )   | 8.0                           | 3.0                                   | -6.7                             | 5.8                        | -4.3                       | 1.5                        | 1.35                            |
| H <sub>3a</sub> $\cdots$ O <sub>bridge(1 or 4)</sub>          | 9.7                           | 3.2                                   | -8.8                             | 7.5                        | -7.0                       | 0.5                        | 1.07                            |
| H <sub>3a</sub> $\cdots$ H5 <sub>a</sub> (C5 <sub>a</sub> )   | 4.1                           | 1.4                                   | -0.8                             | 2.6                        | 1.8                        | 4.4                        | 1.44                            |
| H <sub>3a</sub> $\cdots$ H3 <sub>c</sub> (C3 <sub>c</sub> )   | 6.0                           | 2.0                                   | -4.1                             | 3.9                        | -2.8                       | 1.1                        | 1.39                            |
| H <sub>3a</sub> $\cdots$ H5 <sub>b</sub> (C5 <sub>b</sub> )   | 3.8                           | 1.2                                   | -0.6                             | 2.3                        | -1.7                       | 0.6                        | 1.35                            |
| H <sub>3a</sub> $\cdots$ H3 <sub>d</sub> (C3 <sub>d</sub> )   | 5.7                           | 2.1                                   | -2.4                             | 4.1                        | -2.9                       | 1.2                        | 1.41                            |
| H <sub>5a</sub> $\cdots$ H5 <sub>c</sub> (C5 <sub>c</sub> )   | 0.9                           | 0.3                                   | -0.4                             | 0.5                        | -0.3                       | 0.2                        | 1.67                            |
| H <sub>5a</sub> $\cdots$ H5 <sub>d</sub> (C5 <sub>d</sub> )   | 1.1                           | 0.4                                   | -0.6                             | 0.6                        | -0.4                       | 0.2                        | 1.50                            |
| H <sub>6a</sub> $\cdots$ H3 <sub>e</sub> (C3 <sub>e</sub> )   | 0.9                           | 0.3                                   | -0.4                             | 0.5                        | -0.3                       | 0.2                        | 1.67                            |
| H <sub>acid</sub> $\cdots$ O <sub>bridge(1 or 4)</sub>        | 20.8                          | 6.5                                   | -23.6                            | 17.0                       | -17.7                      | -0.7                       | 0.96                            |
| H <sub>acid</sub> $\cdots$ H5 <sub>b</sub> (C5 <sub>b</sub> ) | 9.5                           | 3.7                                   | -6.0                             | 7.8                        | -6.3                       | 1.5                        | 1.24                            |
| O <sub>aryl</sub> $\cdots$ H3 <sub>f</sub> (C3 <sub>f</sub> ) | 5.4                           | 1.9                                   | -3.1                             | 4.0                        | -3.2                       | 0.8                        | 1.25                            |
| O <sub>aryl</sub> $\cdots$ H5 <sub>e</sub> (C5 <sub>e</sub> ) | 11.2                          | 4.0                                   | -10.2                            | 9.2                        | -8.3                       | 0.9                        | 1.11                            |

For **B4**

| BCP                             | $\rho_b$<br>( $\times 10^3$ ) | $\nabla^2\rho_b$<br>( $\times 10^2$ ) | $\lambda_2$<br>( $\times 10^3$ ) | $G_b$<br>( $\times 10^3$ ) | $V_b$<br>( $\times 10^3$ ) | $H_b$<br>( $\times 10^3$ ) | $-G_b/V_b$<br>( $\times 10^3$ ) |
|---------------------------------|-------------------------------|---------------------------------------|----------------------------------|----------------------------|----------------------------|----------------------------|---------------------------------|
| N1 $\cdots$ O <sub>bridge</sub> | 14.7                          | 5.5                                   | -9.7                             | 12.8                       | -11.9                      | 0.9                        | 1.08                            |
| N3 $\cdots$ H6(O6)              | 22.2                          | 7.1                                   | -24.9                            | 17.4                       | -17.1                      | 0.3                        | 1.02                            |
| N2 $\cdots$ H1(C1)              | 8.9                           | 3.1                                   | -6.3                             | 6.6                        | -5.5                       | 1.1                        | 1.20                            |
| N5 $\cdots$ O6(H6)              | 6.8                           | 2.4                                   | -4.1                             | 5.5                        | -5.0                       | 0.5                        | 1.10                            |
| N5 $\cdots$ H6(C6)              | 6.5                           | 2.3                                   | -1.4                             | 4.8                        | -3.8                       | 1.0                        | 1.26                            |
| C <sub>1a</sub> $\cdots$ H2(C2) | 6.4                           | 2.0                                   | -1.7                             | 4.1                        | -3.2                       | 0.9                        | 1.28                            |
| C <sub>6a</sub> $\cdots$ H4(C4) | 7.5                           | 2.4                                   | -3.9                             | 4.9                        | -3.8                       | 1.1                        | 1.29                            |
| H <sub>6a</sub> $\cdots$ O6(H6) | 15.2                          | 4.8                                   | -15.2                            | 11.9                       | -11.8                      | 0.1                        | 1.00                            |

For **B5**

| BCP                 | $\rho_b$<br>( $\times 10^3$ ) | $\nabla^2\rho_b$<br>( $\times 10^2$ ) | $\lambda_2$<br>( $\times 10^3$ ) | $G_b$<br>( $\times 10^3$ ) | $V_b$<br>( $\times 10^3$ ) | $H_b$<br>( $\times 10^3$ ) | $-G_b/V_b$<br>( $\times 10^3$ ) |
|---------------------|-------------------------------|---------------------------------------|----------------------------------|----------------------------|----------------------------|----------------------------|---------------------------------|
| N2 $\cdots$ H2(C2)  | 8.6                           | 3.1                                   | -1.4                             | 6.9                        | -5.9                       | 1                          | 1.17                            |
| N5 $\cdots$ O3(H3)  | 9.5                           | 3.2                                   | -3                               | 7.4                        | -6.9                       | 0.5                        | 1.07                            |
| N5 $\cdots$ H4(C4)  | 7.2                           | 2.5                                   | -2.7                             | 5.3                        | -4.5                       | 0.8                        | 1.18                            |
| C1a $\cdots$ H4(C4) | 6.9                           | 2.3                                   | -2.6                             | 4.8                        | -3.8                       | 1                          | 1.26                            |

|              |     |     |      |     |      |     |      |
|--------------|-----|-----|------|-----|------|-----|------|
| C2a···Oring  | 2   | 0.7 | -0.3 | 1.4 | -0.9 | 0.5 | 1.56 |
| C4a···O6(H6) | 8.4 | 2.9 | -1.6 | 6.3 | -5.4 | 0.9 | 1.17 |
| C6a···H5(C5) | 6.1 | 1.9 | -3.5 | 3.8 | -2.8 | 1   | 1.36 |

---

**Table S3** The selected charge transfer energies for the B3 complex from NBO calculations.

|              |                                            |      |                                                   |      |                                                       |      |                                                                                                                                                                                       |
|--------------|--------------------------------------------|------|---------------------------------------------------|------|-------------------------------------------------------|------|---------------------------------------------------------------------------------------------------------------------------------------------------------------------------------------|
| <b>Table</b> | $LP_{N1} \rightarrow \sigma^*_{C3a-H3a}$   | 0.22 | $\sigma_{C2a-H2a} \rightarrow RY^*_{Obridge}$     | 0.32 | $\sigma_{C3a-H3a} \rightarrow \sigma^*_{C5b-H5b}$     | 0.18 | <b>S4</b> NMR chemical shifts (ppm) of the isolated host, guest and the <b>B3</b> complex calculated in $CH_2Cl_2$ solvent at the Wb97xd/ 6-31+G(d,p) and M06-2X/ 6-31+G(d,p) levels. |
|              | $LP_{N2} \rightarrow \sigma^*_{C3a'-H3a}$  | 0.42 | $\sigma_{C2a-H2a} \rightarrow \sigma^*_{C3a-H3a}$ | 0.14 | $\sigma_{Oaryl-Hacid} \rightarrow RY^*_{Obridge}$     | 2.06 |                                                                                                                                                                                       |
|              | $LP_{N3} \rightarrow \sigma^*_{O3-H3}$     | 0.60 | $\sigma_{C3a-H3a} \rightarrow RY^*_{Obridge}$     | 1.33 | $\sigma_{Oaryl-Hacid} \rightarrow RY^*_{H5b}$         | 0.17 |                                                                                                                                                                                       |
|              | $LP_{N4} \rightarrow \sigma^*_{O2-H2}$     | 0.36 | $\sigma_{C3a-H3a} \rightarrow RY^*_{H3c}$         | 0.18 | $\sigma_{Oaryl-Hacid} \rightarrow \sigma^*_{C5b-H5b}$ | 0.59 |                                                                                                                                                                                       |
|              | $LP_{N5} \rightarrow \sigma^*_{C3b-H3b}$   | 2.56 | $\sigma_{C3a-H3a} \rightarrow \sigma^*_{C3c-H3c}$ | 0.40 | $LP_{Oaryl} \rightarrow \sigma^*_{C5e-H5e}$           | 0.82 |                                                                                                                                                                                       |
|              | $\pi_{N4-N5} \rightarrow \sigma^*_{O2-H2}$ | 0.94 | $\sigma_{C3a-H3a} \rightarrow \sigma^*_{C5a-H5a}$ | 0.10 | $LP_{Obridge} \rightarrow \sigma^*_{Oaryl-Hacid}$     | 7.63 |                                                                                                                                                                                       |
|              | $\pi_{N3-N2} \rightarrow \sigma^*_{O3-H3}$ | 0.61 | $\sigma_{C3a-H3a} \rightarrow \sigma^*_{C3d-H3d}$ | 0.28 | $\sigma_{C5b-H5b} \rightarrow \sigma^*_{Oaryl-Hacid}$ | 0.89 |                                                                                                                                                                                       |

For **Wb97xd/ 6-31+G(d,p)**

| guest-host                 | host <sup>a</sup> | host <sup>b</sup> | guest    | guest <sup>a</sup> | guest <sup>b</sup> |
|----------------------------|-------------------|-------------------|----------|--------------------|--------------------|
| $N1 \cdots H3_a(C3_a)$     | 4.19              | 2.94              | $C_{1a}$ | 110.5              | 112.5              |
| $N5 \cdots H3_b(C3_b)$     | 4.21              | 5.26              | $C_{2a}$ | 105.7              | 108.6              |
| $H_{2a} \cdots O_{bridge}$ |                   |                   | $C_{3a}$ | 97.8               | 101                |
| $H_{2a} \cdots H3_a(C3_a)$ | 4.19              | 2.94              | $C_{4a}$ | 141                | 142.2              |
| $H_{3a} \cdots O_{bridge}$ |                   |                   | $C_{5a}$ | 99.9               | 102.8              |
| $H_{3a} \cdots H5_a(C5_a)$ | 4.38              | 4.49              | $C_{6a}$ | 106                | 108                |
| $H_{3a} \cdots H3_c(C3_c)$ | 4.13              | 4.71              | N1       | 290.9              | 291.4              |
| $H_{3a} \cdots H5_b(C5_b)$ | 4.33              | 4.40              | N2       | 339.2              | 341.4              |

|                                                         |      |      |                   |       |       |
|---------------------------------------------------------|------|------|-------------------|-------|-------|
| H <sub>3a</sub> ···H3 <sub>d</sub> (C3 <sub>d</sub> )   | 4.28 | 4.91 | N3                | 372.4 | 374   |
| H <sub>5a</sub> ···H5 <sub>c</sub> (C5 <sub>c</sub> )   | 4.44 | 4.53 | N4                | 372.4 | 377   |
| H <sub>5a</sub> ···H5 <sub>d</sub> (C5 <sub>d</sub> )   | 4.26 | 4.66 | N5                | 339.2 | 342.1 |
| H <sub>6a</sub> ···H3 <sub>e</sub> (C3 <sub>e</sub> )   | 4.2  | 4.47 | H <sub>2a</sub>   | 8.99  | 9.3   |
| H <sub>acid</sub> ···O <sub>bridge</sub>                |      |      | H <sub>3a</sub>   | 7.31  | 7.86  |
| H <sub>acid</sub> ···H5 <sub>b</sub> (C5 <sub>b</sub> ) | 4.33 | 4.4  | H <sub>5a</sub>   | 7.67  | 7.86  |
| O <sub>aryl</sub> ···H3 <sub>f</sub> (C3 <sub>f</sub> ) | 4.25 | 4.7  | H <sub>6a</sub>   | 9.04  | 9.13  |
| O <sub>aryl</sub> ···H5 <sub>e</sub> (C5 <sub>e</sub> ) | 5.02 | 4.23 | H <sub>acid</sub> | 5.31  | 6.59  |

---



For **M06-2X/ 6-31+G(d,p)**

| guest-host                                              | host <sup>a</sup> | host <sup>b</sup> | guest             | guest <sup>a</sup> | guest <sup>b</sup> |
|---------------------------------------------------------|-------------------|-------------------|-------------------|--------------------|--------------------|
| N1···H3 <sub>a</sub> (C3 <sub>a</sub> )                 | 3.94              | 2.99              | C <sub>1a</sub>   | 122.7              | 123.8              |
| N5···H3 <sub>b</sub> (C3 <sub>b</sub> )                 | 4.24              | 5.09              | C <sub>2a</sub>   | 119                | 123.4              |
| H <sub>2a</sub> ···O <sub>bridge</sub>                  |                   |                   | C <sub>3a</sub>   | 111.9              | 115.7              |
| H <sub>2a</sub> ···H3 <sub>a</sub> (C3 <sub>a</sub> )   | 3.94              | 2.99              | C <sub>4a</sub>   | 156                | 157                |
| H <sub>3a</sub> ···O <sub>bridge</sub>                  |                   |                   | C <sub>5a</sub>   | 113.9              | 117.8              |
| H <sub>3a</sub> ···H5 <sub>a</sub> (C5 <sub>a</sub> )   | 3.81              | 2.94              | C <sub>6a</sub>   | 119.6              | 121                |
| H <sub>3a</sub> ···H3 <sub>c</sub> (C3 <sub>c</sub> )   | 4.14              | 3.53              | N1                | 320.6              | 320.2              |
| H <sub>3a</sub> ···H5 <sub>b</sub> (C5 <sub>b</sub> )   | 3.78              | 4.01              | N2                | 385.4              | 394                |
| H <sub>3a</sub> ···H3 <sub>d</sub> (C3 <sub>d</sub> )   | 4.3               | 5.16              | N3                | 419.2              | 420.8              |
| H <sub>5a</sub> ···H5 <sub>c</sub> (C5 <sub>c</sub> )   | 3.97              | 4.18              | N4                | 419.2              | 428.8              |
| H <sub>5a</sub> ···H5 <sub>d</sub> (C5 <sub>d</sub> )   | 3.77              | 4.04              | N5                | 385.3              | 391.3              |
| H <sub>6a</sub> ···H3 <sub>e</sub> (C3 <sub>e</sub> )   | 4.43              | 4.81              | H <sub>2a</sub>   | 9.45               | 9.81               |
| H <sub>acid</sub> ···O <sub>bridge</sub>                |                   |                   | H <sub>3a</sub>   | 7.76               | 8.39               |
| H <sub>acid</sub> ···H5 <sub>b</sub> (C5 <sub>b</sub> ) | 3.78              | 4.01              | H <sub>5a</sub>   | 8.07               | 8.58               |
| O <sub>aryl</sub> ···H3 <sub>f</sub> (C3 <sub>f</sub> ) | 3.89              | 4.93              | H <sub>6a</sub>   | 9.49               | 9.77               |
| O <sub>aryl</sub> ···H5 <sub>e</sub> (C5 <sub>e</sub> ) | 3.52              | 4.23              | H <sub>acid</sub> | 5.69               | 7.08               |

<sup>a</sup> in the isolated and <sup>b</sup> in the host-guest complex.

the subscripts with the host stands for the different atoms. The benchmark values for  $\delta_{\text{H}}=31.8821$ ,  $\delta_{\text{C}}=182.4656$  ppm from TMS;  $\delta_{\text{N}}=258.4$  ppm from NH<sub>3</sub>, which were calculated at the B3LYP/6-311+G(2d, p) level.



**Table S5** NMR chemical shifts (ppm) of the isolated host and the **B1**, **B2**, **B4** and **B5** complexes in CH<sub>2</sub>Cl<sub>2</sub> solvent at the M06-2X/ 6-31+G(d,p) level.

For **B1**

| guest-host   | Host | Guest | complex   | Guest | complex |
|--------------|------|-------|-----------|-------|---------|
| N5···H5(C5)  | 3.52 |       | 4.51      | C1a   | 126.2   |
| N5···H3(C3)  | 3.89 |       | 5.49      | C2a   | 120.7   |
| N4···H5(C5)  | 3.78 |       | 3.86      | C3a   | 113.8   |
| N4···H6(C6)  | 4.07 |       | 2.85      | C4a   | 157.1   |
| N2···H3(C3)  | 4.43 |       | 5.23      | C5a   | 116.2   |
| N2···H5(C5)  | 3.97 |       | 3.99      | C6a   | 125.3   |
| N3···H5(C5)  | 3.77 |       | -0.61     | N1    | 320.9   |
| H6a···H3(C3) | 3.89 | 9.49  | 9.67/5.49 | N2    | 394.1   |
| H2a···H3(C3) | 4.43 | 9.25  | 9.45/5.23 | N3    | 422.1   |
| C6a···H3(C3) | 3.94 |       | 9.67      | N4    | 422.2   |
|              |      |       |           | N5    | 391.9   |

For **B2**

| guest-host    | host | guest | complex | guest | complex |
|---------------|------|-------|---------|-------|---------|
| N4···H2(O2)   | 3.99 |       | 4.63    | C1a   | 120.5   |
| N3···H3(C3)   | 4.43 |       | 1.3     | C2a   | 118.9   |
| N5···H3'(C3') | 3.94 |       | 5.04    | C3a   | 113.7   |
| C3a···H3(C3)  | 3.94 |       | 4.42    | C4a   | 158     |

---

|                |      |      |           |     |       |
|----------------|------|------|-----------|-----|-------|
| H2a···H3(C3)   | 4.24 | 9.45 | 9.43/4.18 | C5a | 116   |
| H3a···O3(H3)   | 7.76 |      | 8.34      | C6a | 119.6 |
| H5a···H3(C3)   | 8.07 | 4.14 | 8.29/4.83 | N1  | 320.5 |
| H6a···H3(C3)   | 9.49 | 3.89 | 9.58/4.39 | N2  | 402.6 |
| Hacid···O2(H2) | 5.69 |      | 8.07      | N3  | 402.4 |
| Oaryl···H3(C3) |      | 4.3  | 4.54      | N4  | 425.7 |
| Oaryl···H3(C3) |      | 3.94 | 4.42      | N5  | 377.5 |

---

For **B4**

| guest···host              | host | complex | guest           | complex |
|---------------------------|------|---------|-----------------|---------|
| N3···H6(O6)               | 3.08 | 3.90    | C <sub>1a</sub> | 157.1   |
| N2···H1(C1)               | 5.03 | 4.15    | C <sub>2a</sub> | 110.0   |
| N5···H6(C6)               | 3.88 | 4.02    | C <sub>3a</sub> | 121.5   |
| C <sub>1a</sub> ···H2(C2) | 3.35 | 1.51    | C <sub>4a</sub> | 123.1   |
| C <sub>6a</sub> ···H4(C4) | 3.80 | 3.90    | C <sub>5a</sub> | 122.3   |
| H <sub>6a</sub> ···O6(H6) | 9.49 | 10.84   | C <sub>6a</sub> | 116.1   |
|                           |      |         | N1              | 320.5   |
|                           |      |         | N2              | 385.4   |
|                           |      |         | N3              | 412.4   |
|                           |      |         | N4              | 420.8   |
|                           |      |         | N5              | 402.8   |

For **B5**

| guest-host   | host | guest | complex | host | complex |
|--------------|------|-------|---------|------|---------|
| N2···H2(C2)  | 3.35 |       | 0.6     | C1a  | 122.5   |
| N5···H4(C4)  | 3.8  |       | 2.67    | C2a  | 125.9   |
| C1a···H4(C4) | 3.8  |       | 2.67    | C3a  | 113.7   |
| C6a···H5(C5) | 4.89 |       | 4.58    | C4a  | 158.9   |
|              |      |       |         | C5a  | 114.7   |

---

|     |       |
|-----|-------|
| C6a | 119.1 |
| N1  | 322.3 |
| N2  | 398.1 |
| N3  | 414.8 |
| N4  | 425.8 |
| N5  | 398.4 |

---

**Table S6** The relative energies (kcal mol<sup>-1</sup>) along the decomposition paths of the aryl pentazole in the host-guest complexes. The data under consideration of the bulky CH<sub>2</sub>Cl<sub>2</sub> solvent are put in the parentheses.

|                   | Initial | TS1            | IM1            | TS2            | Product           |
|-------------------|---------|----------------|----------------|----------------|-------------------|
| <b>B1</b>         |         |                |                |                |                   |
| $\Delta(E_0+ZPE)$ | 0       | 40.0<br>(41.3) | 35.3<br>(36.4) | 41.1<br>(41.6) | -26.5 (-<br>24.2) |
| $\Delta H$        | 0       | 40.3           | 36.1           | 41.8           | -24.5             |
| $\Delta G$        | 0       | 39.9           | 34.9           | 40.5           | -29.1             |
| <b>B2</b>         |         |                |                |                |                   |
| $\Delta(E_0+ZPE)$ | 0       | 39.5<br>(40.7) | 35.6<br>(36.5) | 41.5<br>(41.5) | -26.4 (-<br>24.2) |
| $\Delta H$        | 0       | 40.0           | 36.1           | 42.5           | -24.1             |
| $\Delta G$        | 0       | 39.5           | 36.1           | 40.9           | -29.8             |
| <b>B3</b>         |         |                |                |                |                   |
| $\Delta(E_0+ZPE)$ | 0       | 38.3<br>(39.8) | 34.0<br>(35.1) | 37.8<br>(39.2) | -27.1 (-<br>24.3) |
| $\Delta H$        | 0       | 38.8           | 34.6           | 38.5           | -25.3             |
| $\Delta G$        | 0       | 37.2           | 33.5           | 37.3           | -29.3             |
| <b>B4</b>         |         |                |                |                |                   |
| $\Delta(E_0+ZPE)$ | 0       | 41.6<br>(42.3) | 37.8<br>(37.5) | 44.6<br>(43.9) | -23.1 (-<br>21.3) |
| $\Delta H$        | 0       | 42.0           | 38.7           | 45.6           | -21.0             |
| $\Delta G$        | 0       | 40.4           | 36.0           | 43.1           | -26.5             |

---

**B5**

|                   |   |                |                |                |                   |
|-------------------|---|----------------|----------------|----------------|-------------------|
| $\Delta(E_0+ZPE)$ | 0 | 37.0<br>(39.3) | 32.4<br>(33.5) | 37.2<br>(38.4) | -28.6 (-<br>26.9) |
| $\Delta H$        | 0 | 37.1           | 32.9           | 37.7           | -26.7             |
| $\Delta G$        | 0 | 37.9           | 32.5           | 37.6           | -30.6             |

---



**Table S7** Vibration frequencies for the pentazole ring of the isolated aryl pentazole and the host-guest complexes **B1~B5**.

|             | modes                                                                               | guest | B1   | B2   | B3   | B4   | B5   |
|-------------|-------------------------------------------------------------------------------------|-------|------|------|------|------|------|
| vibration 1 |                                                                                     | 1055  | 1062 | 1061 | 1054 | 1074 | 1056 |
| IR          | 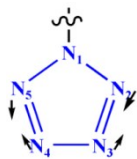 | 60    | 16   | 44   | 56   | 71   | 21   |
| Raman       |  | 45    | 21   | 28   | 26   | 28   | 21   |
| vibration 2 |                                                                                     | 1106  | 1107 | 1108 | 1106 | 1117 | 1105 |
| IR          |  | 11    | 13   | 135  | 61   | 10   | 31   |
| Raman       |  | 14    | 13   | 8    | 13   | 4    | 11   |
| vibration 3 |                                                                                     | 1215  | 1214 | 1213 | 1210 | 1220 | 1208 |
| IR          |  | 27    | 2    | 1    | 9    | 8    | 9    |
| Raman       |  | 5     | 6    | 5    | 2    | 2    | 4    |
| vibration 4 |                                                                                     | 1227  | 1225 | 1224 | 1230 | 1241 | 1227 |
| IR          |  | 4     | 223  | 73   | 2    | 4    | 346  |
| Raman       |  | 1     | 0.9  | 2    | 1    | 0    | 3    |

|             |                                                                                   |             |             |             |             |             |             |
|-------------|-----------------------------------------------------------------------------------|-------------|-------------|-------------|-------------|-------------|-------------|
| vibration 5 |                                                                                   | 1326        | 1329        | 1338        | 1327        | 1341        | 1319        |
| IR          | 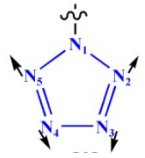 | 36          | 41          | 23          | 52          | 64          | 18          |
| Raman       |                                                                                   | 7           | 10          | 6           | 7           | 6           | 7           |
| vibration 6 |                                                                                   | 1456        | 1451        | 1458        | 1451        | 1458        | 1450        |
| IR          |  | 8           | 8           | 25          | 9           | 16          | 1           |
| Raman       |                                                                                   | 14          | 5           | 35          | 11          | 2           | 2           |
| vibration 7 |                                                                                   | <b>1469</b> | <b>1467</b> | <b>1467</b> | <b>1465</b> | <b>1476</b> | <b>1469</b> |
| IR          |  | 12          | 38          | 25          | 8           | 18          | 23          |
| Raman       |                                                                                   | <b>315</b>  | <b>211</b>  | <b>299</b>  | <b>181</b>  | <b>162</b>  | <b>196</b>  |

---

#### 4. Notes on the $O_{\text{aryl}}-H_{\text{acid}} \cdots H5-C5$ interaction details

The NPA charges of the  $H_{\text{acid}}$  and the H5 are + 0.538 and + 0.220 e in the host-guest complex, respectively. In their isolated states, they are + 0.519 and + 0.239 e, respectively. The  $O_{\text{aryl}}-H_{\text{acid}}$  bond length is 0.972 Å, which is a bit longer than the counterpart 0.964 Å of the isolated guest but close to the average value 0.975 Å of the O-H bonds as the hydrogen bonding donor in the larger

open end of the  $\beta$ -CD. The H5-C5 bond length is 1.101 Å, which is unchanged when compared to the corresponding bond length in the isolated  $\beta$ -CD. The elongated O<sub>aryl</sub>-H<sub>acid</sub> bond should be attributed to the CT effects, mainly from its adjacent LP(O<sub>bridge</sub>) and  $\sigma_{C5H5}$  to  $\sigma^*_{O_{aryl}H_{acid}}$ , and their CT energies are 7.63 and 0.89 kcal mol<sup>-1</sup>, respectively. The special H $\cdots$ H interaction could be stabilized by charge transfer of the  $\sigma_{O_{aryl}H_{acid}} \rightarrow \sigma^*_{C5H5}$ , whose second perturbation energy is 0.59 kcal mol<sup>-1</sup>; in turn the  $\sigma_{C5H5} \rightarrow \sigma^*_{O_{aryl}}$  energy is ca. 0.89 kcal mol<sup>-1</sup>.
